# Supplementary material for: How Do Microplastics Affect Physical Properties of Silt Loam Soil under Wetting–Drying Cycles?
Source: MDPI journal article supplement (doi:10.3390/agronomy13030844), 2023-03-14
Supplement: s1 [file s1]

# **Supplementary Materials of “How microplastics affect physical properties of silt loam soil under wetting–drying cycles?”**

## **Supplementary tables**

|                                                                                                                                                                                            |   |
|--------------------------------------------------------------------------------------------------------------------------------------------------------------------------------------------|---|
| Table S1. Effects of microplastics with the same concentration and wet-dry cycles and different sizes on soil saturated hydraulic conductivity ( $K_s$ ). .....                            | 2 |
| Table S2. Van-Genuchten (V-G) model fitting parameters. ....                                                                                                                               | 4 |
| Table S3. Effects of microplastics with the same concentration and wet-dry cycles and different sizes on soil bulk density ( $\gamma_d$ ) and initial moisture content ( $\theta_i$ )..... | 7 |
| Table S4 RDA summary .....                                                                                                                                                                 | 9 |

1

**Table S1.** Effects of microplastics with the same concentration and wet-dry cycles and different sizes on soil saturated hydraulic conductivity ( $K_s$ ).

| Wetting-<br>drying cycles | Concentration(%) | Size (μm) | $K_s$            | Wetting-<br>drying<br>cycles | Concentration(%) | Size (μm) | $K_s$ (cm/h)     |
|---------------------------|------------------|-----------|------------------|------------------------------|------------------|-----------|------------------|
| T0                        | 1                | 25        | 2.4568(0.3860)a  | T3                           | 1                | 25        | 0.4573(0.0462)a  |
|                           |                  | 150       | 2.1019(0.0901)ab |                              |                  | 150       | 0.2479(0.0097)b  |
|                           |                  | 550       | 2.4204(0.1802)a  |                              |                  | 550       | 0.2165(0.0942)b  |
|                           |                  | 1000      | 1.6985(0.2402)b  |                              |                  | 1000      | 0.2359(0.0667)b  |
|                           | 3                | 25        | 2.3203(0.5791)a  |                              | 3                | 25        | 0.1645(0.0075)c  |
|                           |                  | 150       | 2.0637(0.1081)a  |                              |                  | 150       | 0.3715(0.0150)ab |
|                           |                  | 550       | 2.2783(0.1039)a  |                              |                  | 550       | 0.4481(0.0097)a  |
|                           |                  | 1000      | 2.5917(0.1864)a  |                              |                  | 1000      | 0.2946(0.0788)b  |
|                           | 5                | 25        | 1.5014(0.1930)c  |                              | 5                | 25        | 0.3573(0.0220)b  |
|                           |                  | 150       | 1.8835(0.1544)bc |                              |                  | 150       | 1.8344(0.4324)a  |
|                           |                  | 550       | 2.0617(0.0711)b  |                              |                  | 550       | 0.1908(0.0389)c  |
|                           |                  | 1000      | 2.7674(0.1864)a  |                              |                  | 1000      | 0.1354(0.0113)c  |

| Wetting-<br>drying cycles | Concentration(%) | Size (μm) | $K_s$           | Wetting-<br>drying<br>cycles | Concentration(%) | Size (μm) | $K_s$ (cm/h)    |
|---------------------------|------------------|-----------|-----------------|------------------------------|------------------|-----------|-----------------|
| T1                        | 1                | 25        | 2.3679(0.4663)a | T5                           | 1                | 25        | 0.5332(0.0266)b |
|                           |                  | 150       | 1.8955(0.0865)a |                              |                  | 150       | 0.2866(0.0150)c |
|                           |                  | 550       | 2.1266(0.3051)a |                              |                  | 550       | 0.9660(0.0150)a |
|                           |                  | 1000      | 0.2716(0.0132)b |                              |                  | 1000      | 0.2978(0.0893)c |
|                           | 3                | 25        | 1.6496(0.2408)a |                              | 3                | 25        | 0.2667(0.0169)d |
|                           |                  | 150       | 1.5684(0.2527)a |                              |                  | 150       | 0.3958(0.0193)b |
|                           |                  | 550       | 0.6772(0.4836)b |                              |                  | 550       | 0.4795(0.0025)a |
|                           |                  | 1000      | 0.2745(0.0777)b |                              |                  | 1000      | 0.3389(0.0289)c |
|                           | 5                | 25        | 0.8469(0.0447)c |                              | 5                | 25        | 0.6677(0.0692)a |
|                           |                  | 150       | 0.5096(0.0450)c |                              |                  | 150       | 0.5907(0.0884)a |
|                           |                  | 550       | 0.2200(0.0267)b |                              |                  | 550       | 0.2912(0.0515)b |
|                           |                  | 1000      | 0.2406(0.0200)a |                              |                  | 1000      | 0.1763(0.0434)b |

2  $K_s$  represents soil saturated hydraulic conductivity. a b c d show the significant differences of adding microplastics of the different sizes. ( $P < 0.05$ )

**Table S2.** Van-Genuchten (V-G) model fitting parameters.

| Size ( $\mu\text{m}$ ) | Concentration (%) | Cycle | $\theta_s$ (%) | $\theta_r$ (%) | $\alpha$ | $n$    | RMSE   |
|------------------------|-------------------|-------|----------------|----------------|----------|--------|--------|
|                        | )                 |       |                |                |          |        |        |
| CK                     | 0                 | T0    | 57.26%         | 13.35%         | 0.2106   | 1.6502 | 0.0055 |
|                        |                   | T1    | 40.91%         | 5.10%          | 0.0182   | 1.3262 | 0.0048 |
|                        |                   | T3    | 45.72%         | 8.44%          | 0.0361   | 1.0045 | 0.0054 |
|                        |                   | T5    | 42.63%         | 14.45%         | 0.0161   | 1.9611 | 0.0043 |
| 25                     | 1%                | T0    | 57.15%         | 10.64%         | 0.3307   | 1.4768 | 0.0035 |
|                        |                   | T1    | 51.69%         | 9.26%          | 0.2652   | 1.3637 | 0.0079 |
|                        |                   | T3    | 46.36%         | 16.71%         | 0.0529   | 1.7818 | 0.0044 |
|                        |                   | T5    | 44.13%         | 7.65%          | 0.0356   | 1.0943 | 0.0053 |
|                        | 3%                | T0    | 53.85%         | 11.79%         | 0.4695   | 1.5938 | 0.0037 |
|                        |                   | T1    | 41.98%         | 15.04%         | 0.0379   | 1.1899 | 0.0045 |
|                        |                   | T3    | 44.80%         | 15.26%         | 0.0552   | 1.4428 | 0.0034 |
|                        |                   | T5    | 48.04%         | 12.73%         | 0.0838   | 1.3781 | 0.0049 |
|                        | 5%                | T0    | 50.37%         | 9.24%          | 0.1243   | 1.5271 | 0.0049 |
|                        |                   | T1    | 42.21%         | 14.81%         | 0.0489   | 1.5291 | 0.0028 |
|                        |                   | T3    | 44.22%         | 15.84%         | 0.0769   | 2.3022 | 0.0065 |
|                        |                   | T5    | 45.32%         | 13.00%         | 0.0646   | 1.6280 | 0.0041 |
| 150                    | 1%                | T0    | 56.15%         | 9.02%          | 0.2393   | 1.5060 | 0.0026 |
|                        |                   | T1    | 43.10%         | 5.62%          | 0.0801   | 1.4494 | 0.0080 |
|                        |                   | T3    | 46.70%         | 2.10%          | 0.1249   | 1.8378 | 0.0054 |

| Size ( $\mu\text{m}$ ) | Concentration (%)<br>) | Cycle | $\theta_s$ (%) | $\theta_t$ (%) | $\alpha$ | $n$    | RMSE   |
|------------------------|------------------------|-------|----------------|----------------|----------|--------|--------|
| 550                    | 3%                     | T5    | 40.29%         | 19.92%         | 0.0125   | 1.6629 | 0.0038 |
|                        |                        | T0    | 52.59%         | 5.25%          | 0.1524   | 1.3883 | 0.0053 |
|                        |                        | T1    | 46.59%         | 13.33%         | 0.1730   | 1.5271 | 0.0085 |
|                        |                        | T3    | 44.88%         | 9.52%          | 0.1174   | 1.7729 | 0.0053 |
|                        |                        | T5    | 44.78%         | 15.70%         | 0.0716   | 1.6930 | 0.0070 |
|                        | 5%                     | T0    | 57.19%         | 9.84%          | 0.2595   | 1.5409 | 0.0037 |
|                        |                        | T1    | 39.77%         | 17.25%         | 0.0125   | 2.0841 | 0.0062 |
|                        |                        | T3    | 44.59%         | 12.97%         | 0.0725   | 1.6151 | 0.0042 |
|                        |                        | T5    | 45.64%         | 3.18%          | 0.0741   | 2.7015 | 0.0045 |
|                        | 1%                     | T0    | 55.29%         | 14.75%         | 0.1817   | 1.5015 | 0.0050 |
|                        |                        | T1    | 43.77%         | 13.30%         | 0.0399   | 1.0822 | 0.0036 |
|                        |                        | T3    | 44.60%         | 7.64%          | 0.0494   | 2.8877 | 0.0079 |
|                        |                        | T5    | 51.50%         | 20.00%         | 0.0789   | 1.5660 | 0.0032 |
|                        | 3%                     | T0    | 56.26%         | 13.22%         | 0.2859   | 1.6753 | 0.0028 |
|                        |                        | T1    | 39.49%         | 7.32%          | 0.0216   | 2.6378 | 0.0048 |
|                        |                        | T3    | 41.80%         | 10.48%         | 0.0157   | 1.6006 | 0.0047 |
|                        |                        | T5    | 47.72%         | 14.93%         | 0.1194   | 1.8540 | 0.0064 |
|                        | 5%                     | T0    | 56.01%         | 16.16%         | 0.1651   | 1.5496 | 0.0036 |
|                        |                        | T1    | 42.27%         | 10.07%         | 0.0392   | 1.2180 | 0.0033 |

| Size (μm) | Concentration (%) |  | Cycle | $\theta_s$ (%) | $\theta_t$ (%) | $\alpha$ | $n$    | RMSE   |
|-----------|-------------------|--|-------|----------------|----------------|----------|--------|--------|
|           | )                 |  |       |                |                |          |        |        |
| 1000      | 1                 |  | T3    | 44.58%         | 11.78%         | 0.0679   | 2.2339 | 0.0061 |
|           |                   |  | T5    | 47.05%         | 16.58%         | 0.0804   | 1.9022 | 0.0048 |
|           |                   |  | T0    | 56.64%         | 14.10%         | 0.3155   | 1.9080 | 0.0064 |
|           |                   |  | T1    | 44.71%         | 8.50%          | 0.0491   | 1.2300 | 0.0063 |
|           |                   |  | T3    | 42.94%         | 13.40%         | 0.0254   | 1.5143 | 0.0048 |
|           |                   |  | T5    | 54.62%         | 11.61%         | 0.3017   | 1.3202 | 0.0072 |
|           | 3                 |  | T0    | 55.64%         | 11.71%         | 0.1762   | 2.0001 | 0.0042 |
|           |                   |  | T1    | 45.96%         | 8.59%          | 0.1216   | 1.6963 | 0.0087 |
|           |                   |  | T3    | 46.84%         | 12.33%         | 0.0628   | 1.3724 | 0.0080 |
|           |                   |  | T5    | 48.45%         | 17.77%         | 0.1001   | 1.4777 | 0.0062 |
|           | 5                 |  | T0    | 54.61%         | 16.04%         | 0.0926   | 1.0002 | 0.0053 |
|           |                   |  | T1    | 51.49%         | 12.37%         | 0.4276   | 1.5998 | 0.0085 |
|           |                   |  | T3    | 41.00%         | 13.79%         | 0.0236   | 1.6559 | 0.0041 |
|           |                   |  | T5    | 43.74%         | 16.15%         | 0.0329   | 2.0243 | 0.0055 |

**Table S3.** Effects of microplastics with the same concentration and wet-dry cycles and different sizes on soil bulk density ( $\gamma_d$ ) and initial moisture content ( $\theta_i$ ).

| Wetting-drying<br>cycles | Concentration<br>(%) | Size( $\mu\text{m}$ ) | $\gamma_d$ ( $\text{g}/\text{cm}^3$ ) | $\theta_i$ (%)   |
|--------------------------|----------------------|-----------------------|---------------------------------------|------------------|
| T1                       | 1                    | 25                    | 1.5233(0.0073)ab                      | 0.2114(0.0068)a  |
|                          |                      | 150                   | 1.5020(0.0272)b                       | 0.2066(0.0015)a  |
|                          |                      | 550                   | 1.4098(0.0054)c                       | 0.2004(0.0124)a  |
|                          |                      | 1000                  | 1.5342(0.0058)a                       | 0.2278(0.0082)a  |
|                          | 3                    | 25                    | 1.4707(0.0337)a                       | 0.1841(0.0050)d  |
|                          |                      | 150                   | 1.4864(0.0435)a                       | 0.2014(0.0038)c  |
|                          |                      | 550                   | 1.5224(0.0127)a                       | 0.2311(0.0039)b  |
|                          |                      | 1000                  | 1.5001 (0.0111)a                      | 0.2472(0.0059)a  |
|                          | 5                    | 25                    | 1.4019(0.0530)c                       | 0.2203(0.0018)a  |
|                          |                      | 150                   | 1.5081(0.0004)a                       | 0.1998(0.0040)a  |
|                          |                      | 550                   | 1.4571(0.0117)bc                      | 0.2326(0.0030)a  |
|                          |                      | 1000                  | 1.4485(0.0021)b                       | 0.2143(0.0124)a  |
| T3                       | 1                    | 25                    | 1.5870(0.0038)a                       | 0.1775(0.0023)c  |
|                          |                      | 150                   | 1.6085(0.0078)a                       | 0.2009(0.0032)b  |
|                          |                      | 550                   | 1.5282(0.0444)b                       | 0.2168(0.0065)ab |
|                          |                      | 1000                  | 1.5870(0.0038)a                       | 0.2287(0.0112)a  |
|                          | 3                    | 25                    | 1.4752(0.0269)b                       | 0.1466(0.0043)d  |
|                          |                      | 150                   | 1.5676(0.0512)a                       | 0.2038(0.0013)c  |
|                          |                      | 550                   | 1.5750(0.0241)a                       | 0.2223(0.0051)b  |
|                          |                      | 1000                  | 1.5363(0.0132)b                       | 0.2336(0.0011)a  |
|                          | 5                    | 25                    | 1.4261(0.0214)b                       | 0.1752(0.0114)b  |
|                          |                      | 150                   | 1.5611(0.0372)a                       | 0.1561(0.0017)b  |
|                          |                      | 550                   | 1.4233(0.0290)b                       | 0.2097(0.0091)a  |
|                          |                      | 1000                  | 1.4559(0.0049)b                       | 0.2132(0.0016)a  |
|                          | 1                    | 25                    | 1.3542(0.0092)c                       | 0.1464(0.0018)c  |
|                          |                      | 150                   | 1.5535(0.0346)a                       | 0.1839(0.0002)b  |
|                          |                      | 550                   | 1.4373(0.0134)b                       | 0.1911(0.0063)ab |
|                          |                      | 1000                  | 1.4047(0.0029)b                       | 0.1689(0.0221)a  |

|    |   |      |                 |                  |
|----|---|------|-----------------|------------------|
| T5 | 3 | 25   | 1.4209(0.0013)b | 0.1407(0.0023)b  |
|    |   | 150  | 1.5858(0.0378)a | 0.1919(0.0023)a  |
|    |   | 550  | 1.4238(0.0156)b | 0.1751(0.0177)a  |
|    |   | 1000 | 1.4132(0.0248)b | 0.1989(0.0061)a  |
|    | 5 | 25   | 1.4065(0.0128)b | 0.1699(0.0033)b  |
|    |   | 150  | 1.4760(0.0183)a | 0.1576(0.0032)c  |
|    |   | 550  | 1.4116(0.0166)b | 0.1460(0.0085)bc |
|    |   | 1000 | 1.4995(0.0389)a | 0.2154(0.0088)a  |

$\gamma_d$  represents soil bulk density;  $\theta_i$  represents initial water content; a, b, c, and d show the significant differences of adding microplastics of the different sizes. ( $P < 0.05$ ).



**Table S4** RDA summary

| Statistic                                     | Axis 1 | Axis 2 | Axis 3 | Axis 4 |
|-----------------------------------------------|--------|--------|--------|--------|
| Eigenvalues                                   | 0.2742 | 0.0227 | 0.0103 | 0.3521 |
| Explained<br>variation<br>(cumulative)        | 27.42  | 29.86  | 30.71  | 65.92  |
| Pseudo-<br>canonical<br>correlation           | 0.729  | 0.3391 | 0.3336 | 0      |
| Explained<br>fitted variation<br>(cumulative) | 89.27  | 94.64  | 100    |        |
| Permutation Test Results:                     |        |        |        |        |
| On All Axes                                   |        |        |        |        |
| pseudo-F=6.7, P=0.002                         |        |        |        |        |
